# Supplementary material for: Rotavirus C Replication in Porcine Intestinal Enteroids Reveals Roles for Cellular Cholesterol and Sialic Acids
Source: MDPI journal article supplement (doi:10.3390/v14081825), 2022-08-20
Supplement: s1 [file s1]

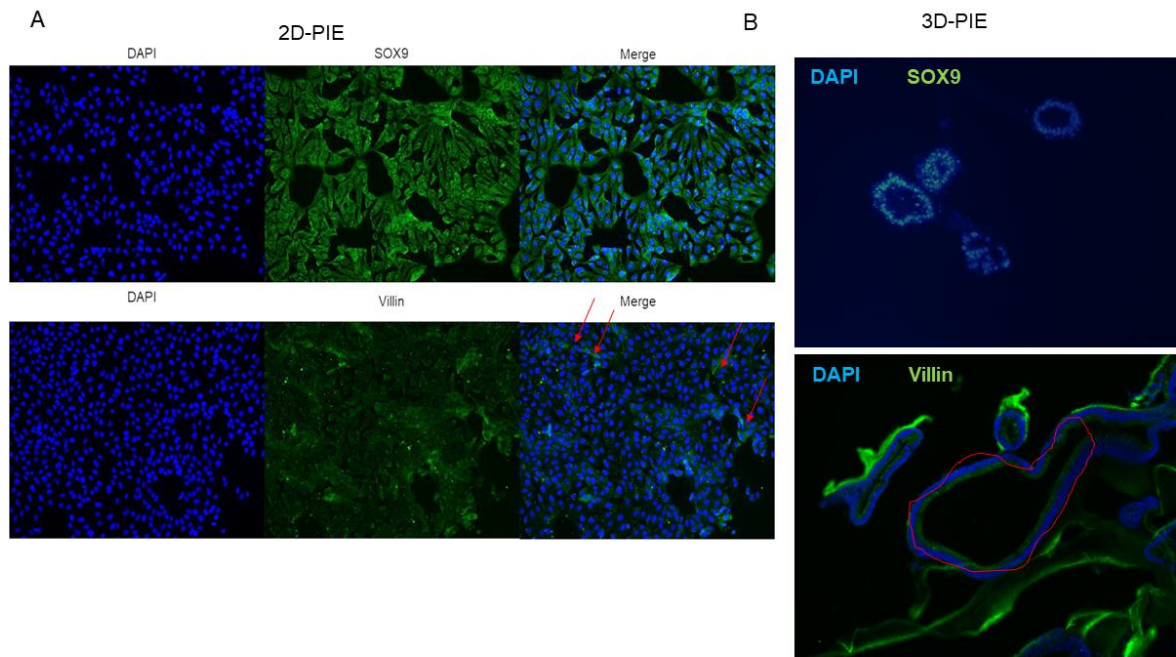

**Figure S1.** Marker expression of 2D monolayer. IF analysis of expression of different proteins on the 2D monolayer and 3D-PIEs. A: SOX9 (upper panel) and villin (lower panel) expression on the (A) 2D monolayer of PIEs and (B) 3D-PIEs. Anti-SOX9 or anti-villin and DAPI staining are shown in green and blue colors, respectively. Red arrows and red lines show villin + cells in 2D and 3D-PIE, respectively.
